# Supplementary material
Source: PubMed Central journal article supplement (PMC4868793)
Supplement: NIHMS758783-supplement-supplement_1.pdf [file NIHMS758783-supplement-supplement_1.pdf]

Supplementary Table 1: Odds ratio of incident CKD among those with eGFR  $\geq$  60ml/min/1.73m<sup>2</sup> at baseline.

| Category of sleep duration<br>(reported in 1986) | Number of individuals | Number with Incident CKD | Odds Ratio (95% CI) |           |                             |           |         |
|--------------------------------------------------|-----------------------|--------------------------|---------------------|-----------|-----------------------------|-----------|---------|
|                                                  |                       |                          | Age adjusted        | P-values  | Fully Adjusted <sup>a</sup> | P-values  | P-trend |
| ≤5 hours                                         | 154                   | 28                       | 1.62 (1.05 – 2.49)  | 0.03      | 1.95 (1.16 – 3.30)          | 0.01      | 0.02    |
| 6 hours                                          | 968                   | 133                      | 1.17 (0.94 – 1.46)  | 0.15      | 1.18 (0.90 – 1.54)          | 0.24      |         |
| 7-8 hours                                        | 2758                  | 339                      | 1.00                | Reference | 1.00                        | Reference |         |
| ≥9 hours                                         | 183                   | 29                       | 1.30 (0.86 – 1.97)  | 0.22      | 0.94 (0.54 – 1.66)          | 0.84      |         |

<sup>a</sup>Adjusted for age, systolic blood pressure, body mass index, baseline eGFR, history of diabetes, history of cardiovascular disease, history of hypercholesterolemia, history of hypertension, incident hypertension during follow-up, acetaminophen use, ace-i use (1988 and 2000), NSAID use (1990 and 2000), and smoking status (current, previous, never).

Supplementary Table 2: Odds ratio for presence of albuminuria (UACR<sup>a</sup>≥30mg/g) in 2000 by category of sleep duration reported in 1986.

| Category of sleep duration<br>(reported in 1986) | Number of individuals | Number of participants with UACR $\geq$ 30mg/g | Odds Ratio of UACR $\geq$ 30mg/g (95% CI) |         |                             |         |         |
|--------------------------------------------------|-----------------------|------------------------------------------------|-------------------------------------------|---------|-----------------------------|---------|---------|
|                                                  |                       |                                                | Age adjusted                              | P-value | Fully Adjusted <sup>a</sup> | P-value | P-trend |
| ≤5 hours                                         | 147                   | 21                                             | 2.36 (1.44 – 3.86)                        | 0.0006  | 2.52 (1.42 – 4.49)          | 0.002   | 0.002   |
| 6 hours                                          | 846                   | 75                                             | 1.38 (1.04 – 1.84)                        | 0.03    | 1.38 (0.97 – 1.96)          | 0.07    |         |
| 7-8 hours (ref)                                  | 2331                  | 156                                            | 1.00 Reference                            |         | 1.00 Reference              |         |         |
| ≥9 hours                                         | 165                   | 12                                             | 1.04 (0.56 – 1.92)                        | 0.9     | 1.02 (0.49 – 2.12)          | 0.9     |         |

<sup>a</sup>Adjusted for Age, systolic blood pressure, body mass index, history of diabetes, history of cardiovascular disease, history of hypercholesterolemia, history of hypertension, acetaminophen use, ACE\_I use (1988 and 2000), NSAID use (1990 and 2000), and smoking status (current, previous, never).

UACR: Urine albumin to creatinine ratio.

Supplemental Table 3: Odds ratio of eGFR decrease of  $\geq 30\%$  between 1989 and 2000 by category of sleep duration among individuals controlling for incidence hypertension between 1989 and 2000.

| Category of sleep duration<br>(reported in 1986) | Number of individuals | Number of events<br>(eGFR decrease $\geq 30\%$ ) | Odds Ratio (95% CI) |           |                             |           |         |
|--------------------------------------------------|-----------------------|--------------------------------------------------|---------------------|-----------|-----------------------------|-----------|---------|
|                                                  |                       |                                                  | Age adjusted        | P-values  | Fully Adjusted <sup>a</sup> | P-values  | P-trend |
| $\leq 5$ hours                                   | 157                   | 31                                               | 1.91 (1.27 – 2.88)  | 0.002     | 1.85 (1.07 – 3.14)          | 0.03      | 0.005   |
| 6 hours                                          | 1007                  | 144                                              | 1.30 (1.05 – 1.60)  | 0.01      | 1.30 (1.00 – 1.70)          | 0.05      |         |
| 7-8 hours<br>(ref)                               | 2882                  | 331                                              | 1.00                | Reference | 1.00                        | Reference |         |
| $\geq 9$ hours                                   | 192                   | 23                                               | 1.04 (0.66 – 1.63)  | 0.88      | 0.86 (0.48 – 1.54)          | 0.62      |         |

<sup>a</sup>Adjusted for age, systolic blood pressure, body mass index, baseline eGFR, history of diabetes, history of cardiovascular disease, history of hypercholesterolemia, history of hypertension, incident hypertension during follow-up, acetaminophen use, ACE-I use (1988 and 2000), NSAID use (1990 and 2000), and smoking status (current, previous, never).

Supplemental Table 4: Odds ratio of eGFR decrease of  $\geq 30\%$  between 1989 and 2000 by category of sleep duration among individuals controlling for incidence cardiovascular disease between 1989 and 2000.

| Category of sleep duration<br>(reported in 1986) | Number of individuals | Number of events<br>(eGFR decrease $\geq 30\%$ ) | Odds Ratio (95% CI) |           |                             |           |         |
|--------------------------------------------------|-----------------------|--------------------------------------------------|---------------------|-----------|-----------------------------|-----------|---------|
|                                                  |                       |                                                  | Age adjusted        | P-values  | Fully Adjusted <sup>a</sup> | P-values  | P-trend |
| $\leq 5$ hours                                   | 157                   | 31                                               | 1.91 (1.27 – 2.88)  | 0.002     | 1.74 (1.03 – 2.95)          | 0.04      | 0.007   |
| 6 hours                                          | 1007                  | 144                                              | 1.30 (1.05 – 1.60)  | 0.01      | 1.31 (1.00 – 1.70)          | 0.05      |         |
| 7-8 hours<br>(ref)                               | 2882                  | 331                                              | 1.00                | Reference | 1.00                        | Reference |         |
| $\geq 9$ hours                                   | 192                   | 23                                               | 1.04 (0.66 – 1.63)  | 0.88      | 0.89 (0.50 – 1.58)          | 0.69      |         |

<sup>a</sup>Adjusted for age, systolic blood pressure, body mass index, baseline eGFR, history of diabetes, history of cardiovascular disease, incident cardiovascular disease during follow-up, history of hypercholesterolemia, history of hypertension, acetaminophen use, ACE-I use (1988 and 2000), NSAID use (1990 and 2000), and smoking status (current, previous, never).

Supplemental Table 5: Odds ratio of eGFR decrease of  $\geq 30\%$  between 1989 and 2000 by category of sleep duration among individuals controlling for incidence diabetes between 1989 and 2000.

| Category of sleep duration<br>(reported in 1986) | Number of individuals | Number of events<br>(eGFR decrease $\geq 30\%$ ) | Odds Ratio (95% CI) |           |                             |           |         |
|--------------------------------------------------|-----------------------|--------------------------------------------------|---------------------|-----------|-----------------------------|-----------|---------|
|                                                  |                       |                                                  | Age adjusted        | P-values  | Fully Adjusted <sup>a</sup> | P-values  | P-trend |
| $\leq 5$ hours                                   | 157                   | 31                                               | 1.91 (1.27 – 2.88)  | 0.002     | 1.78 (1.05 – 3.02)          | 0.04      | 0.006   |
| 6 hours                                          | 1007                  | 144                                              | 1.30 (1.05 – 1.60)  | 0.01      | 1.31 (1.00 – 1.71)          | 0.05      |         |
| 7-8 hours<br>(ref)                               | 2882                  | 331                                              | 1.00                | Reference | 1.00                        | Reference |         |
| $\geq 9$ hours                                   | 192                   | 23                                               | 1.04 (0.66 – 1.63)  | 0.88      | 0.88 (0.50 – 1.56)          | 0.64      |         |

<sup>a</sup>Adjusted for age, systolic blood pressure, body mass index, baseline eGFR, history of diabetes, incident diabetes during follow-up, history of cardiovascular disease, history of hypercholesterolemia, history of hypertension, acetaminophen use, ACE-I use (1988 and 2000), NSAID use (1990 and 2000), and smoking status (current, previous, never).
